# Supplementary material for: Exploring the Links Between Parental Attachment Style, Child Temperament and Parent-Child Relationship Quality During Adolescence
Source: Springer Nature journal article supplement (doi:10.1007/s10826-022-02447-2), 2022-10-01
Supplement: MOESM1 [file 23563080]

| Supplementary Information  *Demographics* | | | |
| --- | --- | --- | --- |
|  | | | Percentage |
| Parent nationality | | |  |
| Irish | | | 81 |
| British | | | 12 |
| European | | | 6 |
| Singaporean | | | 1 |
| Parent Age | | |  |
| 30-39 years | | | 29 |
| 40-49 years | | | 60 |
| 50 - 59 years | | | 10 |
| 60+ years | | | 1 |
| Parent marital status | | |  |
| Married | | | 73 |
| Single | | | 7 |
| Separated/ divorced | | | 12 |
| Widowed | | | 1 |
| Cohabiting | | | 7 |
| Parent Education Level | | |  |
| Primary Level | | | 3 |
| Post-Primary Level | | | 20 |
| 3rd Level - cert/diploma | | | 37 |
| 3rd Level - bachelor’s degree and above | | | 40 |
| Parent Occupation | | |  |
| Unskilled Labour | | | 19 |
| Skilled Labour | | | 11 |
| Professional | | | 53 |
| Self-Employed | | | 17 |
| Parent Employment Status | | |  |
| Unemployed | | | 3 |
| Full-Time Student | | | 3 |
| Full-Time Parent | | | 16 |
| Part-time Employed | | | 34 |
| Full-time Employed | | | 44 |
| Parenting Status |  |
| Co-Parenting | | | 86 |
| Parenting Alone | | | 14 |
